# Supplementary material for: Functionalized jute with high-water absorption, low thermal conductivity and efficient radiative cooling for the preservation of perishable green vegetables with reduced cold storage energy requirements
Source: Royal Society of Chemistry journal article supplement (doi:10.1039/d4ta02507e), 2024-01-01
Supplement: d4ta02507e1.pdf [file d4ta02507e1.pdf]

### Supplementary Information

## **Functionalized jute with high-water absorption, low thermal conductivity and efficient radiative cooling for preservation of perishable green vegetables reducing cold storage energy requirements**

Smruti B. Bhatt<sup>1</sup>, Rahul Ranjan<sup>1</sup>, Sandeep Dahiya<sup>2</sup>, Bhola Nath Pal<sup>2</sup> and Prodyut Dhar<sup>1</sup>

<sup>1</sup> School of Biochemical Engineering, Indian Institute of Technology, (BHU), Varanasi, India, 221005

<sup>2</sup> School of Material Science and Technology, Indian Institute of Technology, (BHU), Varanasi, India, 221005

Corresponding author email: [prodyut.bce@iitbhu.ac.in](mailto:prodyut.bce@iitbhu.ac.in)

**Table S1:-** Thermogravimetric parameters of NJF, DJF, PJF30, PJF45, PJF60 and PJF75

| Sample Name | T <sub>onset</sub> (10 % degradation) | T <sub>max</sub> (°C) | T <sub>max</sub> (% degradation) | Residual weight % (700 °C) |
|-------------|---------------------------------------|-----------------------|----------------------------------|----------------------------|
| NJF         | 272 °C                                | 386 °C                | 65.31%                           | 3.31%                      |
| DJF         | 274 °C                                | 370 °C                | 63.63%                           | 7.68%                      |
| PJF30       | 149 °C                                | 278 °C                | 53.09%                           | 32.32%                     |
| PJF45       | 222 °C                                | 296 °C                | 43.66%                           | 28.46%                     |
| PJF60       | 178 °C                                | 279 °C                | 46.01%                           | 28.36%                     |
| PJF75       | 166 °C                                | 280 °C                | 52.04%                           | 30.76%                     |

**Table S2:** Represents the elemental composition of DJF and PJF30 from XPS Analysis

| DJF     |            |
|---------|------------|
| Element | Atomic (%) |
| C       | 69.11      |
| O       | 30.79      |
| P       | -          |
| PJF30   |            |
| C       | 67.59      |
| O       | 30.49      |
| P       | 1.92       |

**Table S3:** - Crystal structure properties of DJF, PJF30, PJF45, PJF60 and PJF75

| Name of sample | 2θ   | C.I.   | Crystallite size (in nm) | d-spacing (in nm) |
|----------------|------|--------|--------------------------|-------------------|
| <b>DJF</b>     | 16.2 | 69.51% | 0.03                     | 0.545             |
|                | 22.5 |        | 0.046                    | 0.398             |
| <b>PJF30</b>   | 16.8 | 68.35% | 0.033                    | 0.5334            |
|                | 22.5 |        | 0.046                    | 0.3967            |
| <b>PJF45</b>   | 16.8 | 65.62% | 0.032                    | 0.53              |
|                | 22.5 |        | 0.044                    | 0.391             |
| <b>PJF60</b>   | 16.8 | 63.30% | 0.032                    | 0.535             |
|                | 22.5 |        | 0.041                    | 0.395             |
| <b>PJF75</b>   | 16.8 | 61.87% | 0.036                    | 0.514             |
|                | 22.5 |        | 0.036                    | 0.392             |

**Table S4:**

Sensitivity analysis of dominant environmental categories for the production of 1 kg of phosphorylated jute by varying key parameters electricity, delignification, phosphorylation

| Categories                                         | Electricity  |             | Delignification |             | Phosphorylation |             |
|----------------------------------------------------|--------------|-------------|-----------------|-------------|-----------------|-------------|
|                                                    | 10% increase | 8% decrease | 10% increase    | 8% decrease | 10% increase    | 8% decrease |
| <b>Fossil Depletion</b>                            | 9.68         | -7.80       | 4.30            | -3.49       | 2.96            | -2.69       |
| <b>Freshwater consumption</b>                      | 0.35         | -0.35       | 8.45            | -6.83       | 1.39            | -1.16       |
| <b>Photochemical Ozone Formation, Ecosystems</b>   | 9.91         | -7.96       | 4.35            | -3.45       | 3.00            | -2.40       |
| <b>Photochemical Ozone Formation, Human Health</b> | 9.92         | -7.97       | 4.36            | -3.46       | 3.01            | -2.41       |

**Table S5:** - Sensitivity analysis of dominant environmental categories for the storage of 600 kg of coriander leaves for 8 days in cold storage and the remaining 2 days in phosphorylated

jute by varying key parameters electricity, delignification, phosphorylation and wholesaler storage.

| Categories                                         | Electricity  |             | Delignification |             | Phosphorylation |             | Wholesaler Storage |             |
|----------------------------------------------------|--------------|-------------|-----------------|-------------|-----------------|-------------|--------------------|-------------|
|                                                    | 10% increase | 8% decrease | 10% increase    | 8% decrease | 10% increase    | 8% decrease | 10% increase       | 8% decrease |
| <b>Fossil depletion</b>                            | 8.94         | -7.34       | 0.23            | -0.46       | 0.23            | -0.23       | 8.03               | -6.42       |
| <b>Photochemical Ozone Formation, Ecosystems</b>   | 9.82         | -8.13       | 0.28            | -0.42       | 0.14            | -0.42       | 8.84               | -7.29       |
| <b>Photochemical Ozone Formation, Human Health</b> | 9.83         | -8.01       | 0.28            | -0.42       | 0.14            | -0.28       | 8.85               | -7.30       |
| <b>Terrestrial acidification</b>                   | 9.40         | -7.69       | 0.00            | -0.85       | 0.00            | 0.00        | 8.55               | -6.84       |

**Table S6: - List of Assumptions (LCA)**

|                                                                                                                                                                                                                                                                                                                                                                                                                                                                                                    |
|----------------------------------------------------------------------------------------------------------------------------------------------------------------------------------------------------------------------------------------------------------------------------------------------------------------------------------------------------------------------------------------------------------------------------------------------------------------------------------------------------|
| <b>LCA Assumptions for phosphorylated jute production</b>                                                                                                                                                                                                                                                                                                                                                                                                                                          |
| The production of normal jute is considered in LCA                                                                                                                                                                                                                                                                                                                                                                                                                                                 |
| 23 % weight loss was considered during delignification and 10 % weight gain during phosphorylation. Liquid waste generated during delignification; phosphorylation is not considered in the environmental impact calculation                                                                                                                                                                                                                                                                       |
| Electricity sources were considered from hard coal ( <i>GaBi</i> )                                                                                                                                                                                                                                                                                                                                                                                                                                 |
| Sodium chlorite is replaced with sodium hypochlorite;                                                                                                                                                                                                                                                                                                                                                                                                                                              |
| <b>LCA Assumptions for cold storage of coriander leaves</b>                                                                                                                                                                                                                                                                                                                                                                                                                                        |
| Assume that 600 kg of coriander leaves are transported from farm to wholesaler, the distance between the farm and the wholesaler is estimated to be 35 km, and for this journey, the truck utilizes diesel as fuel, consuming a total of 4.97 L. The travel time for this route is approximately 1 hour. The truck involved in the transportation has a weight ranging from 12 to 16.2 tonnes, with an axle configuration of 4*2. The fuel consumption rate for this vehicle is 14.2 L per 100 km. |
| Upon the coriander leaves' arrival at the wholesaler, a Life Cycle Assessment (LCA) is conducted for two scenarios: <b>Case one</b> involving the storage of 600 kg of coriander leaves in cold storage conditions for a period of 10 days, and <b>Case two</b> involving the storage duration of 2 days in 10.6 kg of phosphorylated jute followed by 8 days in cold storage conditions. In case two during LCA, the production of phosphorylated jute is considered.                             |
| The cold storage room measures 2.5 meters in length, 2.5 meters in width, and 2.4 meters in height. It has a maximum capacity of 0.6 tons. The temperature within the cold storage is maintained between -4 to 6 degrees Celsius. The average power consumption for this cold storage facility is 0.75 kilowatt-hours.                                                                                                                                                                             |
| The wholesaler will distribute coriander leaves to retailers based on the prevailing demand                                                                                                                                                                                                                                                                                                                                                                                                        |

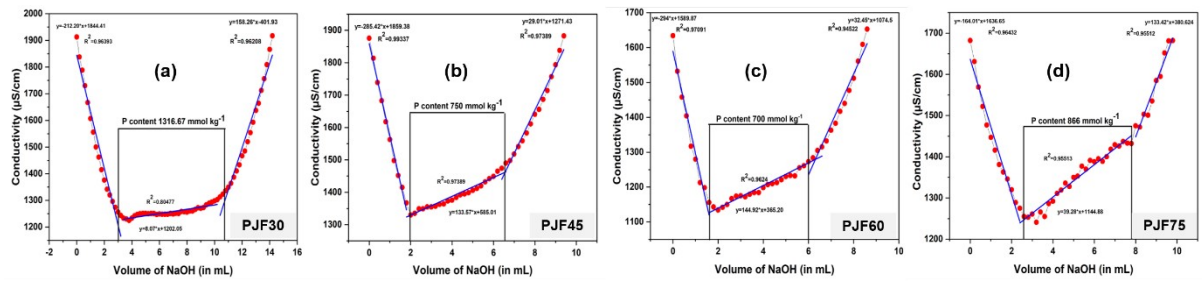

**Figure S1 :** Represents the charge content of (a)PJJ30 (b)PJJ45 (c)PJJ60 (d)PJJ75

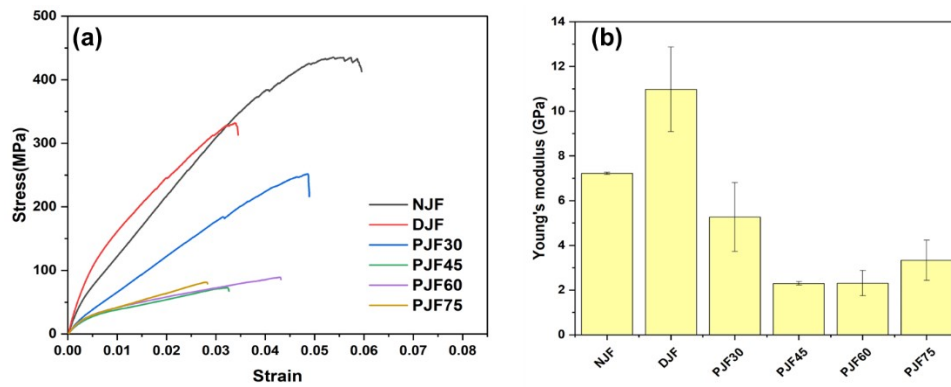

**Figure S2:** - Represents (a) Tensile strength (b) Young's modulus

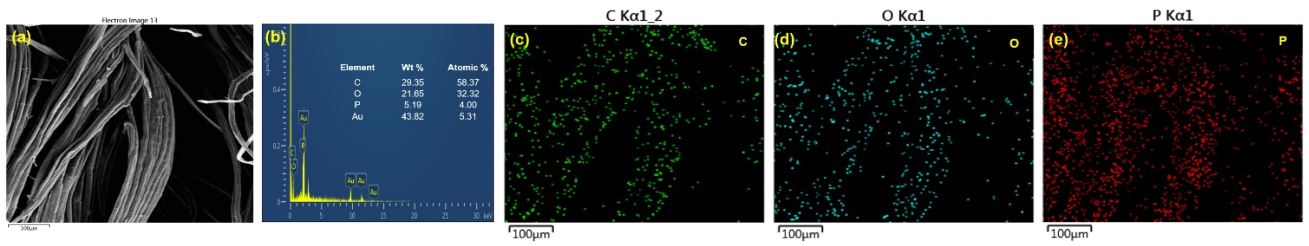

**Figure S3:** - Represents (a) original SEM image (b) EDX spectra of PJF30 with their elemental composition and elemental mapping of (c) carbon, (d) oxygen and (e) phosphorous

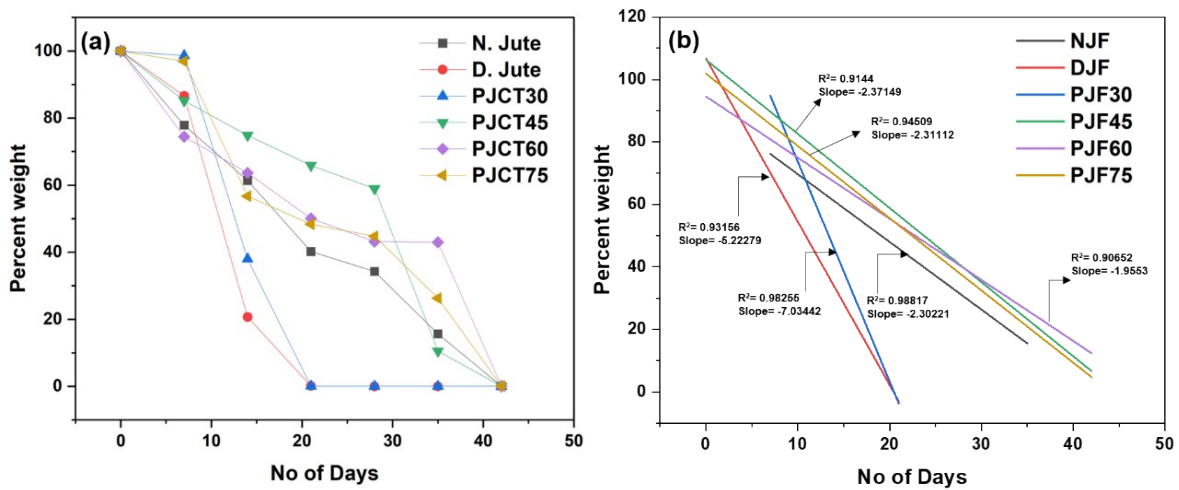

**Figure S4 :** Represents (a) Percent weight loss (b) rate of degradation of samples

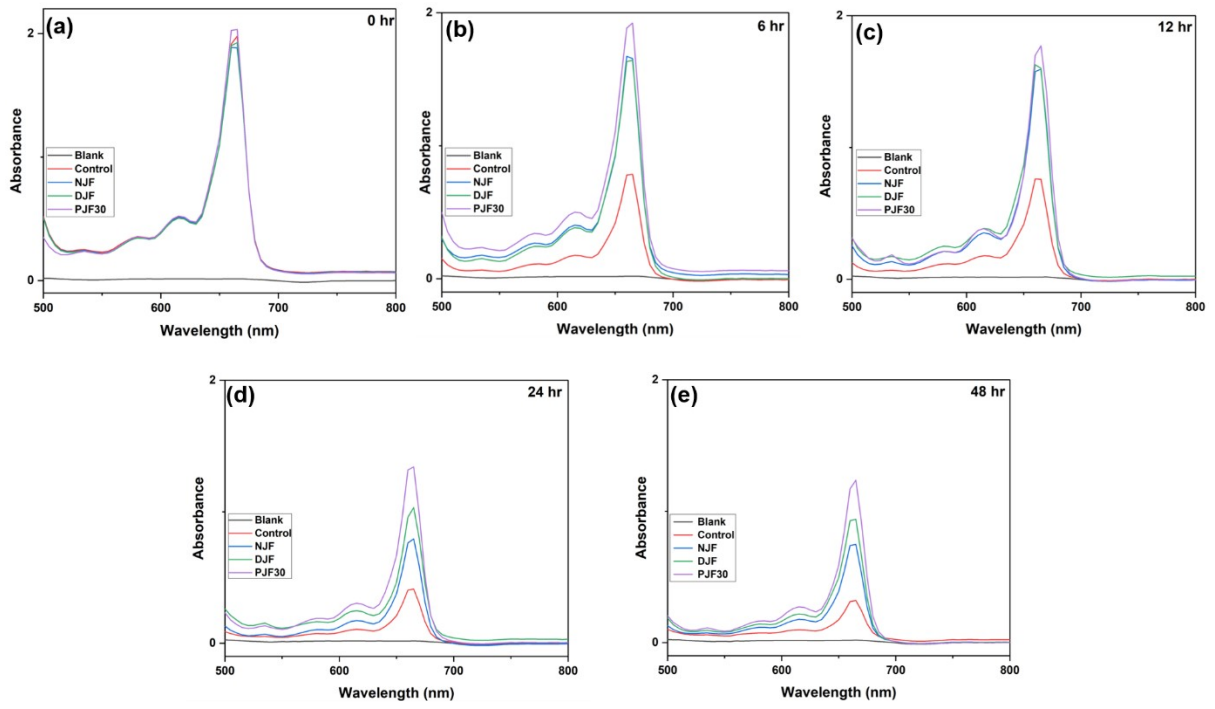

**Figure S5:-** Represents the full scan spectra from 500-800 nm of (a) 0 hr (b)6 hr (c)12 hr (d)24 hr (e)48 hr for the determination of chlorophyll 'a' content

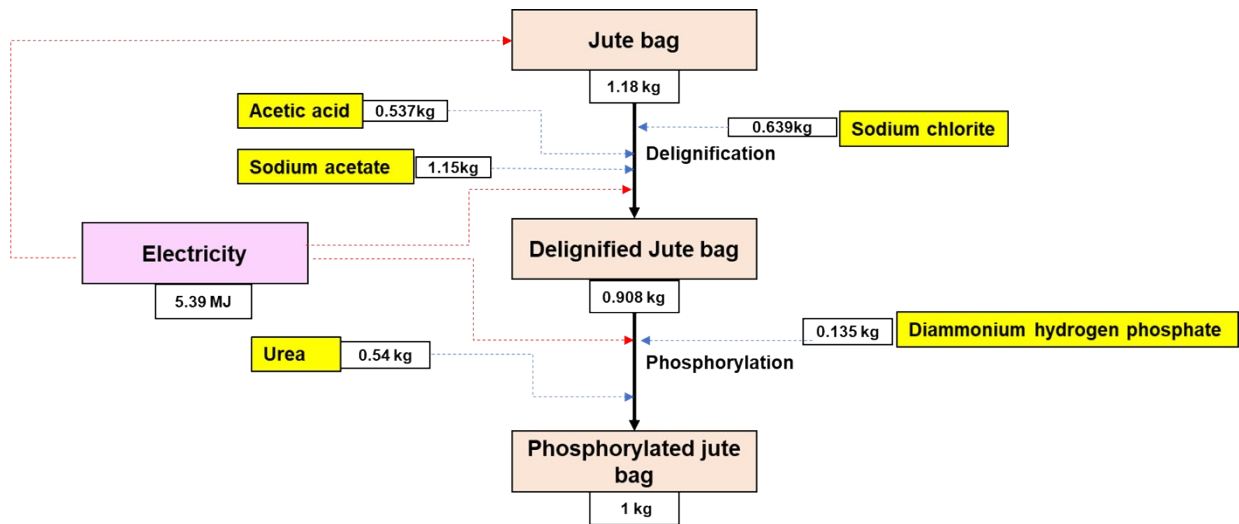

**Figure S6 :-** Schematic for the production of phosphorylated jute and inputs of chemicals, energy involved

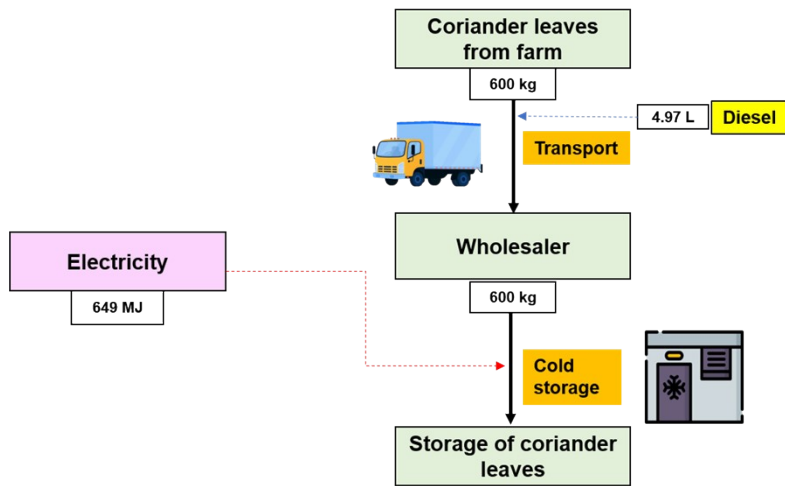

**Figure S7 :-** Schematic for the storage of 600 kg of coriander leaves for a period of 10 days in cold storage and the inputs of energy, chemicals used

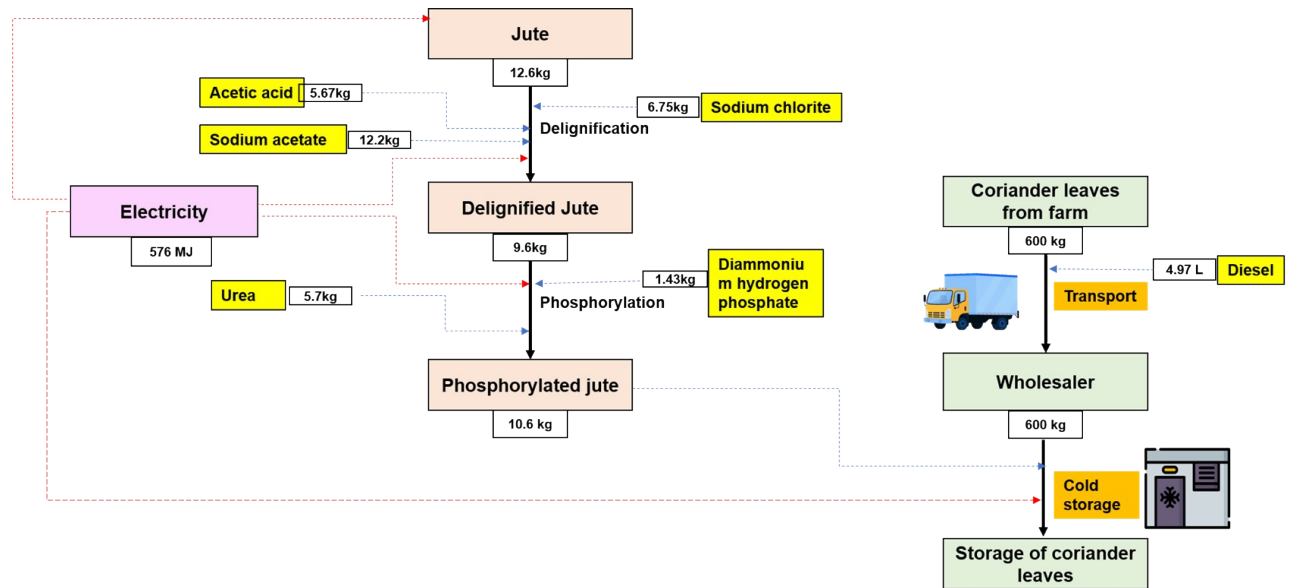

**Figure S8 :-** Schematic for the storage of 600 kg of coriander leaves for 8 days in cold storage and for the remaining 2 days in phosphorylated jute and the inputs of the energy, chemicals used.



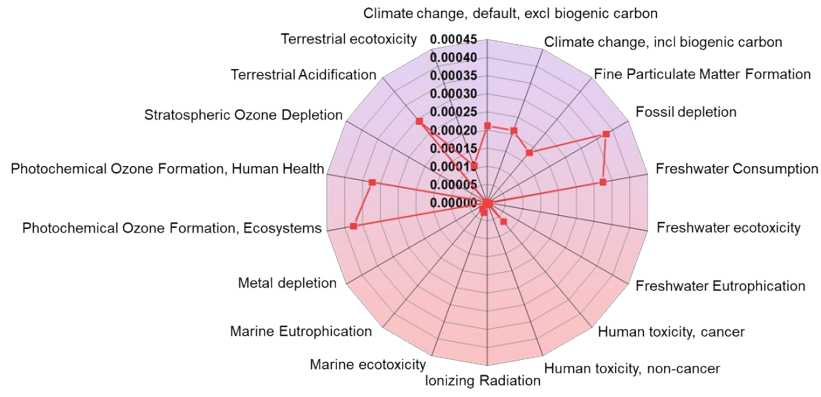

**Figure S9 :** Radar plot of normalized results of production of 1 kg of phosphorylated jute bag

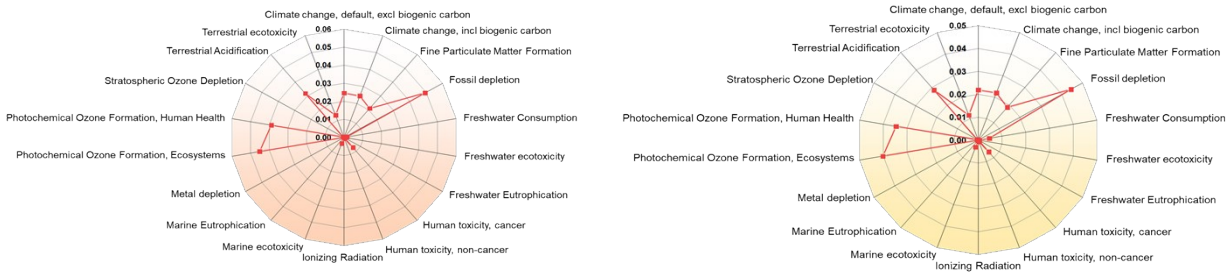

**Figure S10 :** Radar plot of normalized results of (a) Case 1 (b) Case 2

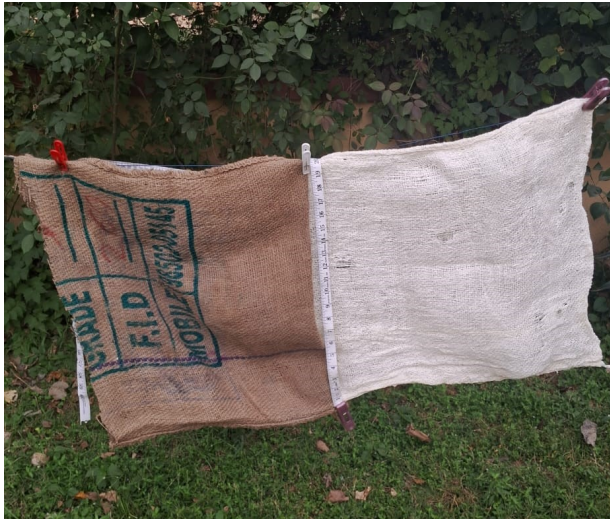

**Figure S11:-**

Photographs of NJF and DJF bags

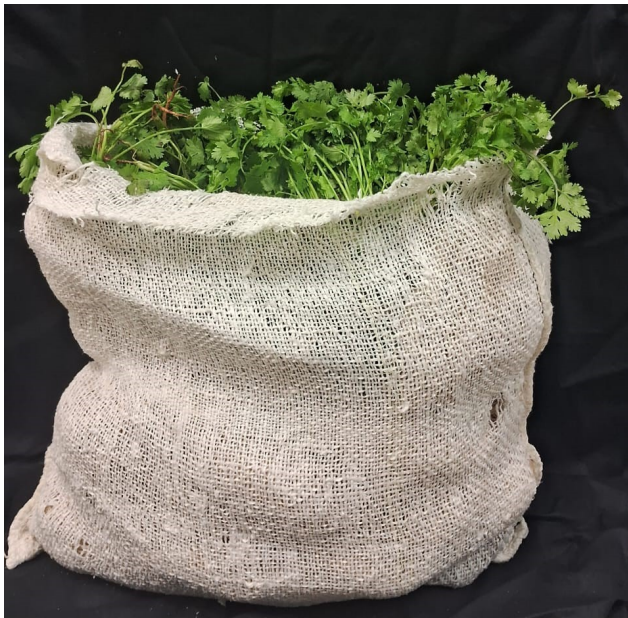

**Figure S12:-**

Representative image of large scale storage of coriander leaves in phosphorylated jute bags

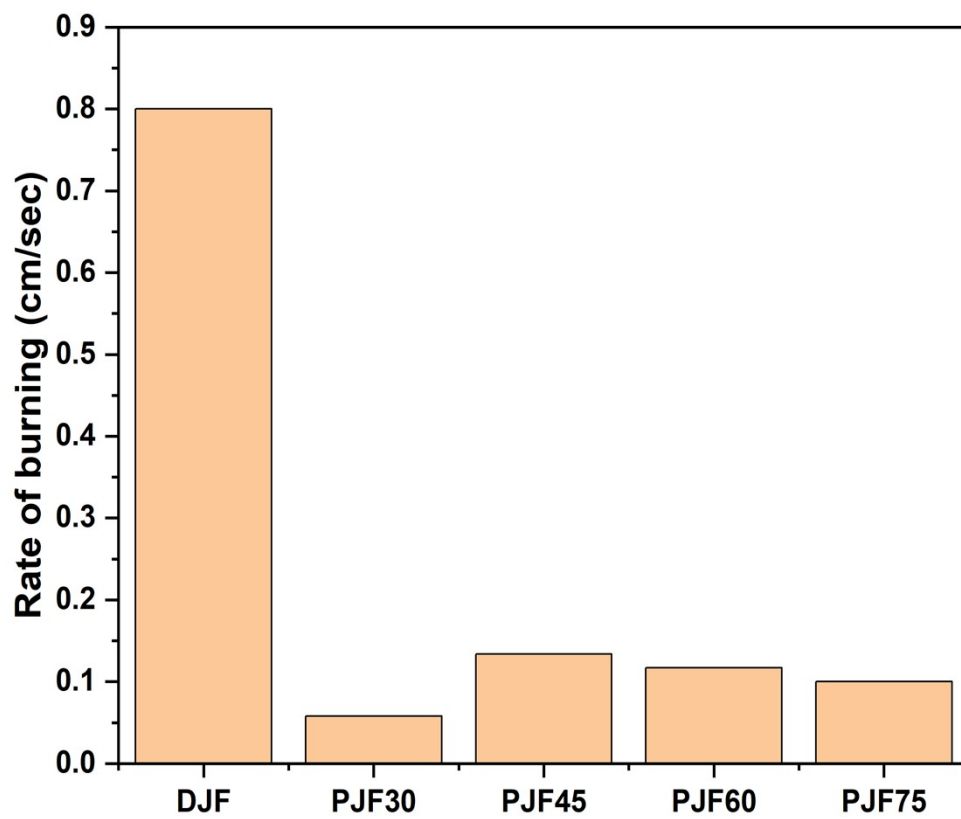

**Figure S13:-** The rate of burning of samples PJF30-75
